# Supplementary material for: Leucine Supplementation Decreases HDAC4 Expression and Nuclear Localization in Skeletal Muscle Fiber of Rats Submitted to Hindlimb Immobilization
Source: MDPI journal article supplement (doi:10.3390/cells9122582), 2020-12-02
Supplement: s1 [file s1]

**Supplemental Table 1: List of genes and primers used for gene expression analysis.**

| GENE                     | GENE ID       | Forward 5'-3'                      | Reverse 3'-5'                      |
|--------------------------|---------------|------------------------------------|------------------------------------|
| <i>Atrogin-1</i>         | NM_133521.1   | GAA CAG CAA AAC CAA AAC<br>TCA GTA | GCT CCT TAG TAC TCC CTT TGT<br>GAA |
| <i>HDAC4</i>             | NM_053449.1   | TGG AAG AGC TGC AGA CAG TG         | TCA GCG AGC TGT CCA GTT TC         |
| <i>Cyclophilin<br/>A</i> | NM_017101.1   | TAT CTG CAC TGC CAA GAC TGA<br>GTG | CTT CTT GCT GGT CTT GCC ATT<br>CC  |
| <i>MYOG</i>              | NM_017115.2   | GTC CCA ACC CAG GAG ATC ATT<br>T   | CCG TTG AGG GGC ATT AAC AA         |
| <i>DACH2</i>             | XM_017588282  | AGA TTG CAC CAA CGC CAG AA         | GGG AGA TCC AGA CGA TTG<br>CTT A   |
| <i>CAMKII</i>            | XM_0175900609 | TGC CTT TGA ACC CGA AGC AT         | GAA CAT CCG TCC AGT AGT<br>TGA T   |
